# Supplementary material
Source: PubMed Central journal article supplement (PMC4245877)
Supplement: Supp_Fig1.pdf [file Supp_Fig1.pdf]

## Supplementary Data

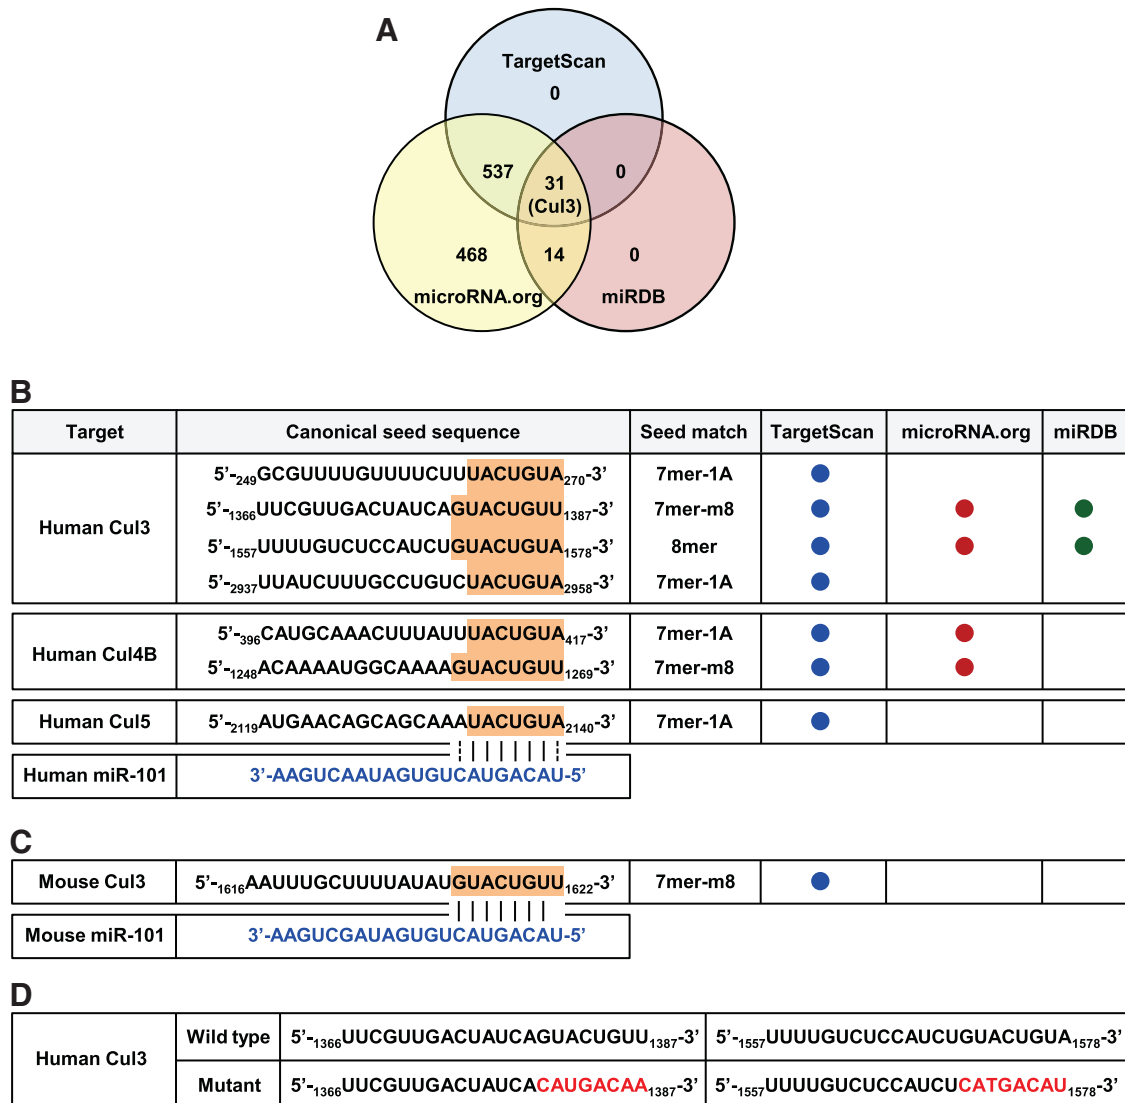

**SUPPLEMENTARY FIG. S1. Computational prediction of miR-101 targets.** (A) Venn diagram displaying mRNAs computationally predicted to targets Cul3 by TargetScan, microRNA.org, and miRDB. Highly reliable targets were selected using cutoff scores of  $\leq 0.1$  for TargetScan and miRDB and  $\geq 60$  for microRNA.org. (B) Alignment of potential binding sites of human in the 3'UTRs of human cullin gene family. (C) Alignment of potential binding site of mouse miR-101 in the 3'UTR of mouse Cul3. (D) The sequence of Cul3 3'UTR mutants used for the reporter assay. 3'UTR, 3'untranslated region; Cul, cullin; miRNA, miR, microRNA.
