# Supplementary material
Source: PubMed Central journal article supplement (PMC4245877)
Supplement: Supp_Fig2.pdf [file Supp_Fig2.pdf]

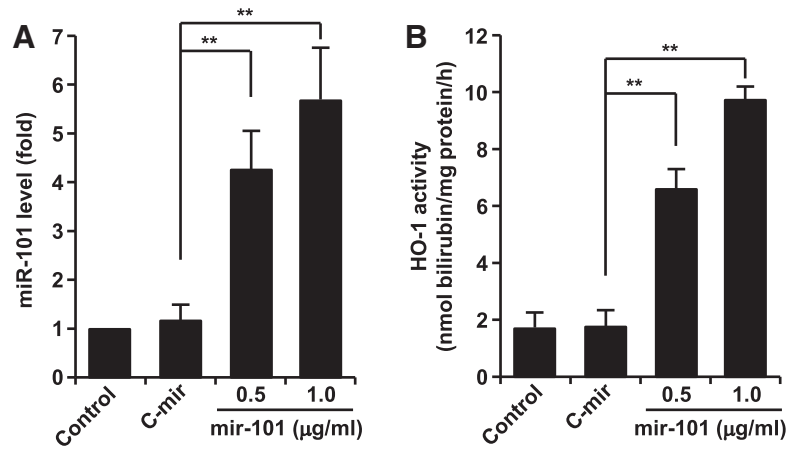

**SUPPLEMENTARY FIG. S2. Effect of precursor miR-101 on HO-1 activity.** HUVECs were transfected with or without 0.5 and 1  $\mu\text{g/ml}$  of pSilencer 2.1-U6/pre-miR-101 (mir-101) or pSilencer 2.1-U6/C-mir for 24 h, followed by incubation in fresh media for 12 h. **(A)** Levels of mature miR-101 were determined by qRT-PCR. **(B)** HO-1 activity was determined in cell lysates by measuring bilirubin production. Data represent the mean  $\pm$  standard deviation ( $n=3$ ).  $**p < 0.01$ . HO-1, heme oxygenase-1; HUVEC, human umbilical vein endothelial cell; qRT-PCR, quantitative real-time polymerase chain reaction.
