# Supplementary material
Source: PubMed Central journal article supplement (PMC4245877)
Supplement: Supp_Fig3.pdf [file Supp_Fig3.pdf]

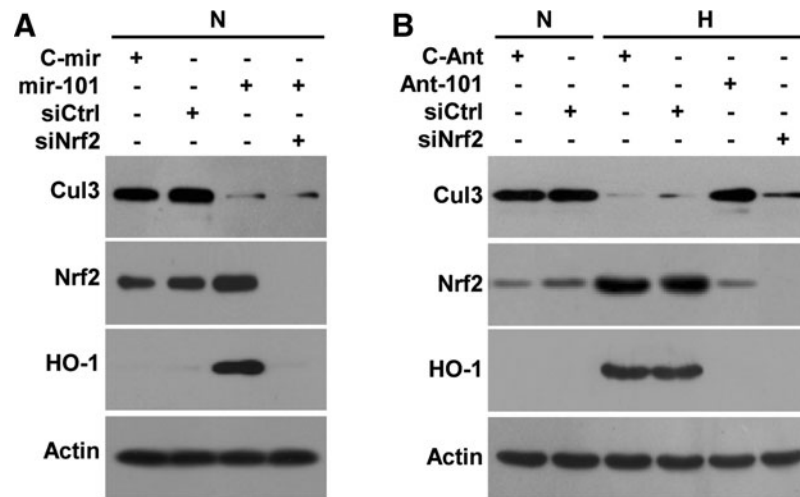

**SUPPLEMENTARY FIG. S3. Effects of Nrf2 on HO-1 induction by hypoxia and miR-101.** HUVECs were transfected with control (siCtrl) and Nrf2 siRNAs (siNrf2) or in combination with pSilencer 2.1-U6/mir-101 or pSilencer 2.1-U6/C-mir, antagomiR-101 (Ant-101), or control antagomiR (C-Ant) for 24 h. The cells were maintained under normoxia (**A**) or hypoxia (**B**) for 12 h. The levels of target proteins were determined by Western blotting. Nrf2, nuclear factor erythroid-derived 2-related factor 2.
