# Supplementary material
Source: PubMed Central journal article supplement (PMC4245877)
Supplement: Supp_Fig4.pdf [file Supp_Fig4.pdf]

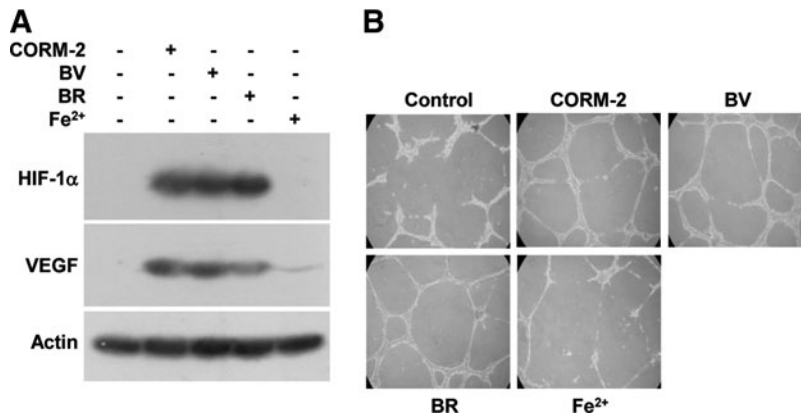

**SUPPLEMENTARY FIG. S4. Effects of HO-1 reaction products on expression of HIF-1 $\alpha$ -dependent VEGF expression and *in vitro* angiogenesis.** HUVECs were treated with 50  $\mu$ M of CORM-2 (a carbon monoxide-releasing compound), biliverdin (BV), bilirubin (BR), or FeCl<sub>2</sub>. **(A)** After 12 h, the protein levels of HIF-1 $\alpha$  (and VEGF) were determined by Western blot analysis. **(B)** Tube formation of ECs on Matrigel was observed by phase-contrast microscopy. EC, endothelial cell; HIF-1 $\alpha$ , hypoxia-inducible factor-1 $\alpha$ ; VEGF, vascular endothelial growth factor.
