# Supplementary material
Source: PubMed Central journal article supplement (PMC4245877)
Supplement: Supp_Fig5.pdf [file Supp_Fig5.pdf]

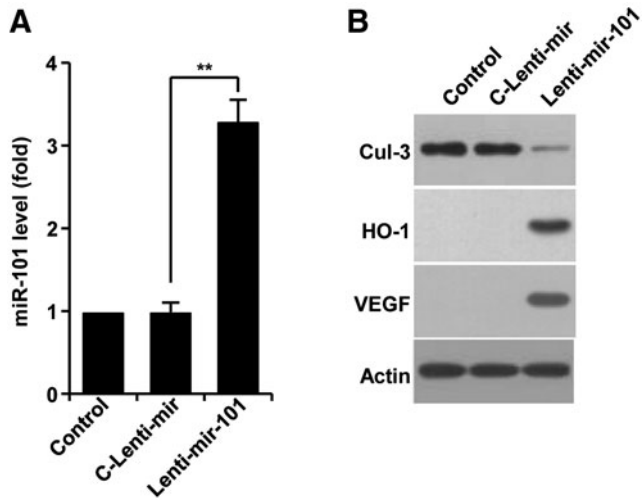

**SUPPLEMENTARY FIG. S5. Lentivirus carrying mir-101 targets Cul3 and activates HO-1/VEGF axis via miR-101 expression.** HUVECs were transfected with lentivirus carrying mir-101 (Lenti-mir-101) or control mir (C-Lenti-mir) for 6 h and recovered in fresh media for 12 h. Expression levels of miR-101 (A) and target genes (B) were determined by qRT-PCR and Western blotting, respectively. Data represent the mean  $\pm$  SD ( $n=4$ )  $**p<0.01$ .
