# Supplementary material
Source: PubMed Central journal article supplement (PMC4245877)
Supplement: Supp_Fig6.pdf [file Supp_Fig6.pdf]

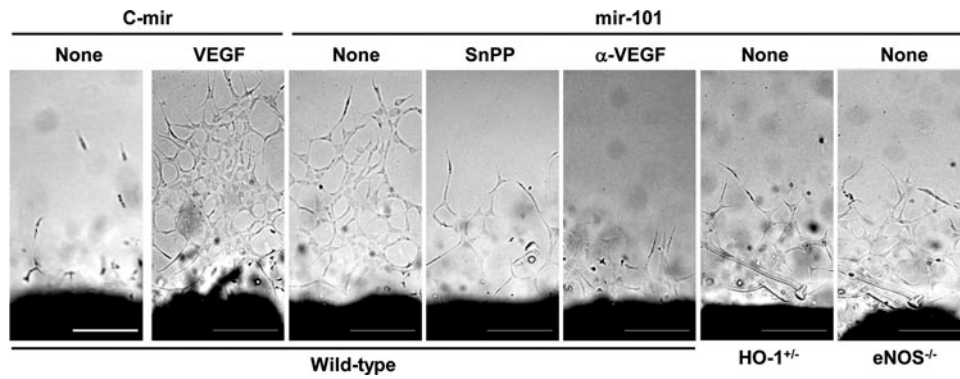

**SUPPLEMENTARY FIG. S6. miR-101 stimulates EC growth from mouse aortic rings via HO-1/VEGF axis.** Aortic rings from wild type, HO-1<sup>+/-</sup>, and eNOS<sup>-/-</sup> mice were transfected with lentivirus containing mir-101 or control mir (C-mir) and cultured on Matrigel in the presence or absence of SnPP and a neutralizing VEGF antibody at 37°C for 18 days. Representative images of aortic ring sprouts were photographed. Scale bars: 0.5 mm. eNOS, endothelial nitric oxide synthase; SnPP, tin-protoporphyrin IX.
